# Supplementary material
Source: PubMed Central journal article supplement (PMC2556838)

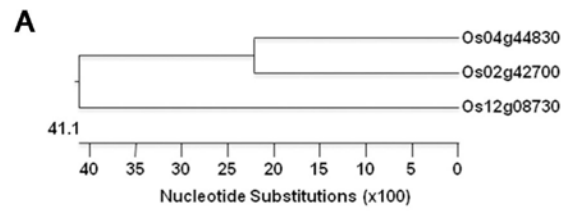

**B**

Percent identity

|            | Os02g42700 | Os04g44830 | Os12g08730 |
|------------|------------|------------|------------|
| Os02g42700 | -          | 52.8       | 24.2       |
| Os04g44830 | 44.5       | -          | 23.9       |
| Os12g08730 | 78.6       | 85.7       | -          |

Divergence

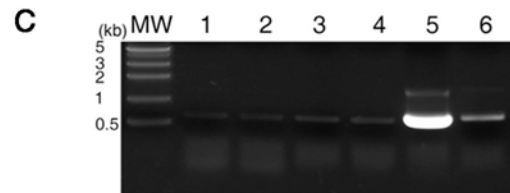

Supplement: pp.108.123547_1.pdf [file pp.108.123547_1.pdf]

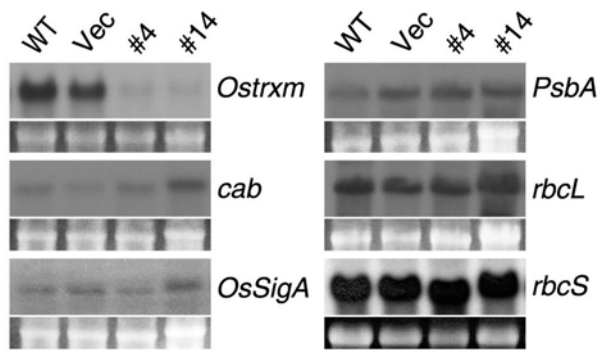

Supplement: pp.108.123547_2.pdf [file pp.108.123547_2.pdf]
